# Supplementary material
Source: bioRxiv or medRxiv preprint supplement (https://www.biorxiv.org/highwire/filestream/46424/field_highwire_adjunct_files/2/131292-3.pdf)

(A) Geographic Richness of environmental biology journals

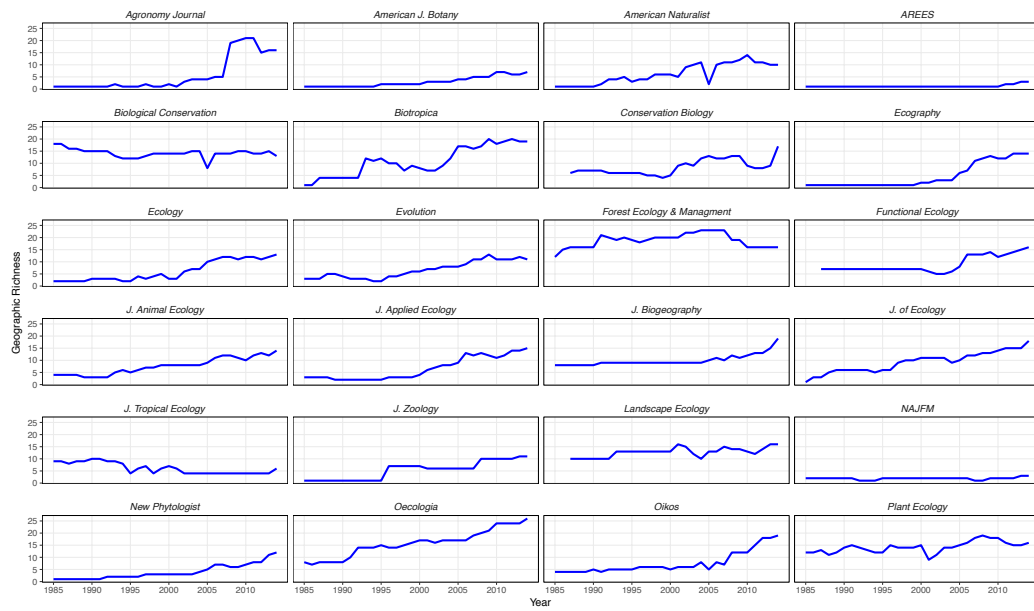

(B) Geographic Diversity of environmental biology journals

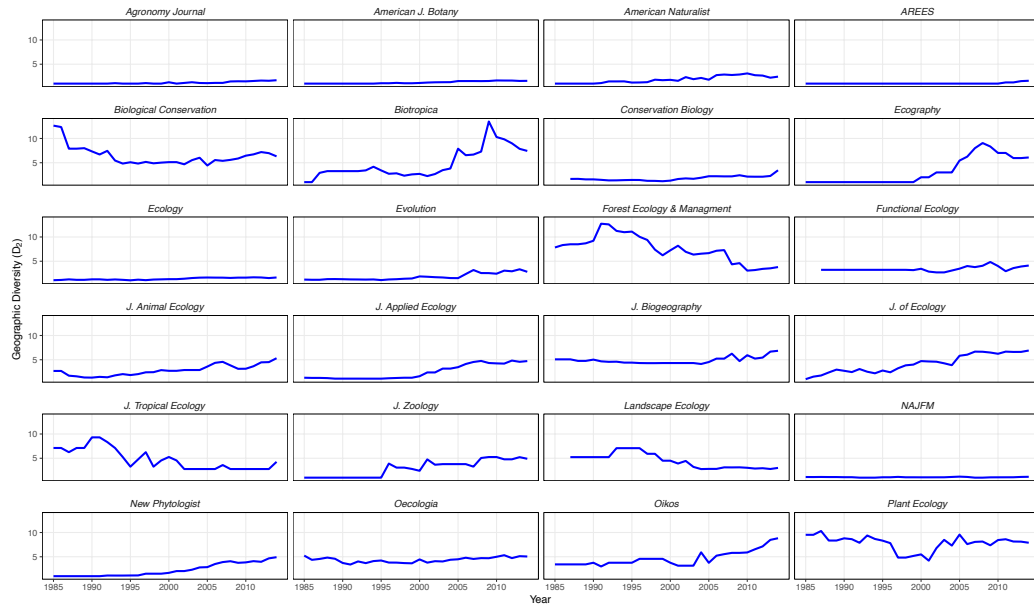

(C) Geographic Evenness of environmental biology journals

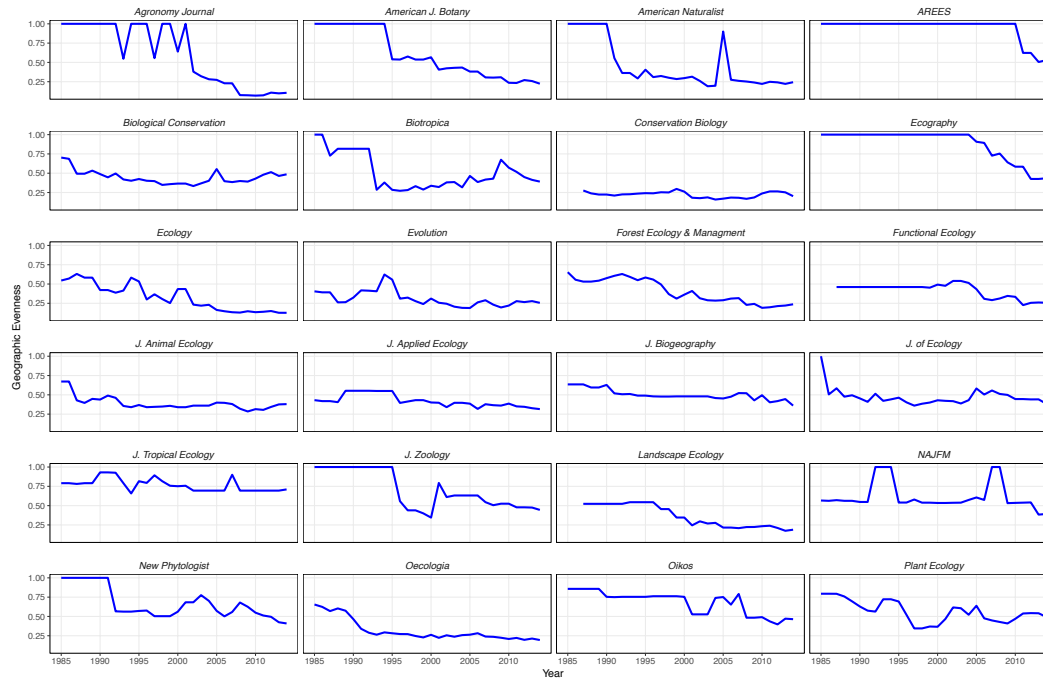

Supplement: Supplementary file [file 131292-3.pdf]
